# Supplementary material for: Comprehensive analysis of negatively correlated miRNA-mRNA regulatory pairs associated with breast cancer diagnosis
Source: Research Square preprint supplement (doi:10.21203/rs.3.rs-1512841/v1), 2022-04-13
Supplement: Supplementary file 1 [file 9e59e2dffadcbc3ad2b10bee.xlsx]

## Sheet: Table S1
	Table S1: The sequences of primers for candidate miRNAs and targeted mRNAs.
		Name	Forword Primer Sequences (5'→3')	Reverse Primer Sequences (5'→3')
	miRNA mature	has-miR-195-5p	TAGCAGCACAGAAATATTG	universal reverse primer
		has-miR-139-5p	TCTACAGTGCACGTGTCTCCA	universal reverse primer
		has-miR-205-5p	TCCTTCATTCCACCGGAGT	universal reverse primer
		has-miR-125b-5p	TCCCTGAGACCCTAACTTGT	universal reverse primer
		has-miR-145-5p	GTCCAGTTTTCCCAGGAATC	universal reverse primer
		hsa-miR-139-5p	TCTACAGTGCACGTGTCTCCA	universal reverse primer
		has-miR-21-5p	TAGCTTATCAGACTGATGTT	universal reverse primer
		has-miR-182-5p	TTTGGCAATGGTAGAACTCACA	universal reverse primer
		has-miR-96-5p	TTTGGCACTAGCACATTTTT	universal reverse primer
		has-miR-200c-3p	TAATACTGCCGGGTAATGAT	universal reverse primer
		hsa-miR-342-3p	TCTCACACAGAAATCGCACCC	universal reverse primer
	mRNA	RACGAP1	TCCAATTTATCCAGTTGGCGAA	CTTCAGCTTAACATCCAGAGCA
		TPD52	AGCATCTAGCAGAGATCAAGCG	AGCCAACAGACGAAAAAGCAG
		HMGB3	CCCAGAGGTCCCTGTCAATTT	CGATCATAGCGCACTTTATCTGC
		PARP1	CGGAGTCTTCGGATAAGCTCT	TTTCCATCAAACATGGGCGAC
		TPM3	TGAAAACCGGGCCTTAAAAGAT	GATCACCAACTTACGAGCCAC
		PIK3R1	ACCACTACCGGAATGAATCTCT	GGGATGTGCGGGTATATTCTTC
		ARRDC3	ATGCAAGAGGACATGCGAAAG	GTGGAAGCCTTCTTCGGAATTAT
		FOXO1	TCGTCATAATCTGTCCCTACACA	CGGCTTCGGCTCTTAGCAAA
		FBLN5	TCGCCAGTCAGGACAGTGT	AGTAGGGGTTCGAGTAGGGC
		TACC1	TCAGCGAATCAGACAAGACAGC	CCGGGTCTCTTCGTATTTCTTC
	Reference gene	RUN6B	CGATAAAATTGGAACGATACAGA	ATTTGGACCATTTCTCGATTTGT
		GAPDH	ACAACTTTGGTATCGTGGAAGG	GCCATCACGCCACAGTTTC
		18s rRNA	CGCAGCTAGGAATAATGGAATAGG	GCCTCAGTTCCGAAAACCAA

## Sheet: Table S2
down microRNA	up mRNA	p-value	r-value		up microRNA	down mRNA	p-value	r-value
hsa-miR-195-5p	RACGAP1	1.45586e-18	-0.256018		hsa-miR-21-5p	PIK3R1	8.01868e-09	-0.16956
hsa-miR-139-5p	TPD52	4.5813e-15	-0.228997		hsa-miR-182-5p	ARRDC3	2.69611e-08	-0.163531
hsa-miR-205-5p	HMGB3	0.00158408	-0.0933315		hsa-miR-96-5p	FOXO1	2.32625e-20	-0.268737
hsa-miR-125b-5p	PARP1	4.82923e-16	-0.236886		hsa-miR-200c-3p	FBLN5	3.25947e-05	-0.122556
hsa-miR-145b-5p	TPM3	8.86869e-13	-0.209282		hsa-miR-342-3p	TACC1	1.02468e-05	-0.130085
hsa-miR-195-5p	FAM189A2	2.84563e-37	0.364666		hsa-miR-21-5p	LOXL1	1.20049e-36	0.361667
hsa-miR-195-5p	TP63	8.97634e-37	0.362275		hsa-miR-21-5p	CERCAM	4.38379e-30	0.32806
hsa-miR-195-5p	DST	1.89199e-36	0.360713		hsa-miR-21-5p	COL5A1	6.56131e-16	0.235828
hsa-miR-195-5p	TXNIP	1.55525e-31	0.33585		hsa-miR-21-5p	MMP14	2.90324e-15	0.23062
hsa-miR-195-5p	S1PR1	1.928e-31	0.335355		hsa-miR-21-5p	COL3A1	9.96603e-15	0.226203
hsa-miR-195-5p	LIFR	9.32718e-30	0.326267		hsa-miR-21-5p	MEIS3	1.30996e-13	0.216664
hsa-miR-195-5p	MYLK	9.54522e-30	0.326212		hsa-miR-21-5p	CTHRC1	1.0686e-11	0.199243
hsa-miR-195-5p	ZFP36L2	6.79177e-29	0.321493		hsa-miR-21-5p	TRPM4	2.50853e-10	0.185701
hsa-miR-195-5p	EGR1	1.32947e-28	0.319859		hsa-miR-21-5p	TIMM13	4.69517e-10	0.182888
hsa-miR-195-5p	CYR61	2.31105e-28	0.318505		hsa-miR-21-5p	CD276	7.37077e-09	0.169971
hsa-miR-195-5p	TGFBR2	4.66515e-28	0.316776		hsa-miR-155-5p	CXCL9	5.87182e-63	0.466933
hsa-miR-195-5p	JUN	1.06115e-27	0.314738		hsa-miR-155-5p	STAT1	3.31722e-25	0.300028
hsa-miR-195-5p	KLF9	1.85669e-27	0.313342		hsa-miR-155-5p	FLI1	2.00873e-20	0.269175
hsa-miR-195-5p	DUSP1	2.73953e-27	0.312367		hsa-miR-155-5p	RHBDF2	3.27724e-20	0.267709
hsa-miR-195-5p	CXCL12	3.50191e-27	0.311749		hsa-miR-155-5p	APOC1	2.03738e-16	0.239837
hsa-miR-195-5p	ARRDC3	1.05042e-26	0.308969		hsa-miR-155-5p	HMGA1	6.66988e-16	0.235771
hsa-miR-195-5p	PDGFD	3.65666e-26	0.305774		hsa-miR-155-5p	TMC6	1.24884e-10	0.18878
hsa-miR-195-5p	PER2	2.19348e-25	0.301116		hsa-miR-155-5p	TCF19	4.80004e-10	0.182788
hsa-miR-195-5p	CRY2	9.39683e-25	0.297269		hsa-miR-155-5p	OAS2	7.3333e-10	0.18086
hsa-miR-195-5p	FAM126A	3.99327e-24	0.293385		hsa-miR-182-5p	SPDEF	1.05674e-20	0.271087
hsa-miR-195-5p	LEPR	4.10137e-24	0.293313		hsa-miR-182-5p	P2RX4	9.78318e-20	0.264398
hsa-miR-195-5p	RCBTB2	1.10544e-23	0.290615		hsa-miR-182-5p	MEIS3	2.87836e-18	0.253854
hsa-miR-195-5p	TEF	1.60639e-23	0.289591		hsa-miR-182-5p	PPP1R37	1.79582e-17	0.247936
hsa-miR-195-5p	TGFBR3	5.83945e-23	0.28602		hsa-miR-182-5p	AGR3	1.81893e-17	0.247895
hsa-miR-195-5p	DAB2IP	1.41626e-22	0.283539		hsa-miR-182-5p	PRSS8	2.04917e-16	0.239817
hsa-miR-195-5p	SGK1	1.98817e-21	0.275987		hsa-miR-182-5p	CBX4	1.46771e-15	0.233024
hsa-miR-195-5p	ZFP36	1.37014e-20	0.270316		hsa-miR-182-5p	MAGED2	3.26563e-15	0.230203
hsa-miR-195-5p	FOS	4.77005e-20	0.266578		hsa-miR-182-5p	TSTD1	3.76664e-15	0.229695
hsa-miR-195-5p	C20orf194	5.66965e-20	0.266055		hsa-miR-182-5p	TCEA3	3.91401e-15	0.229559
hsa-miR-195-5p	METTL7A	1.11129e-19	0.264009		hsa-miR-182-5p	KDM4B	8.83265e-15	0.226639
hsa-miR-195-5p	PIK3R1	1.30441e-19	0.26352		hsa-miR-182-5p	AGR2	1.7969e-14	0.224058
hsa-miR-195-5p	BOC	1.5934e-19	0.262907		hsa-miR-182-5p	TRPM4	2.17949e-13	0.214725
hsa-miR-195-5p	FOXO1	2.08902e-19	0.262074		hsa-miR-182-5p	PLXNA3	7.10525e-12	0.200925
hsa-miR-195-5p	MSRB3	3.24187e-19	0.260717		hsa-miR-182-5p	TJP3	1.06691e-11	0.199249
hsa-miR-195-5p	ARID5B	3.61515e-19	0.26038		hsa-miR-182-5p	SIGIRR	2.0551e-11	0.196516
hsa-miR-195-5p	KCNC4	1.34815e-18	0.256261		hsa-miR-182-5p	NR2F6	4.71342e-10	0.18287
hsa-miR-139-5p	RGS2	2.67646e-15	0.230908		hsa-miR-182-5p	SLC22A18	6.0391e-10	0.181746
hsa-miR-139-5p	MET	5.33651e-16	0.236541		hsa-miR-182-5p	AP1S1	6.08428e-10	0.181712
hsa-miR-139-5p	CYBRD1	3.03244e-16	0.238482		hsa-miR-182-5p	GATA3	8.1738e-10	0.180363
hsa-miR-139-5p	EPHA2	1.47267e-16	0.240937		hsa-miR-182-5p	CACNB3	3.06724e-09	0.174189
hsa-miR-139-5p	LIMCH1	1.45544e-16	0.240976		hsa-miR-142-3p	CXCL9	1.63424e-73	0.50055
hsa-miR-139-5p	CFL2	4.42104e-17	0.244966		hsa-miR-142-3p	STAT1	1.01277e-32	0.34206
hsa-miR-139-5p	REV3L	2.23367e-17	0.247221		hsa-miR-142-3p	FLI1	1.3827e-25	0.302324
hsa-miR-139-5p	RPS6KA3	7.05838e-18	0.250974		hsa-miR-142-3p	RHBDF2	8.51601e-23	0.284966
hsa-miR-139-5p	TLE4	3.42232e-18	0.253301		hsa-miR-142-3p	HMGA1	1.38415e-15	0.23323
hsa-miR-139-5p	PRNP	2.314e-18	0.254549		hsa-miR-142-3p	LRRC8C	1.34295e-12	0.207644
hsa-miR-139-5p	PPL	2.11289e-18	0.254838		hsa-miR-142-3p	APOC1	3.37291e-11	0.194424
hsa-miR-139-5p	TPPP	2.05474e-18	0.254927		hsa-miR-142-3p	CCDC82	6.60606e-11	0.191547
hsa-miR-139-5p	ARRDC3	1.38268e-18	0.256181		hsa-miR-142-3p	E2F3	1.13572e-10	0.189195
hsa-miR-139-5p	PIK3R1	6.05782e-19	0.258773		hsa-miR-142-3p	TMC6	2.13787e-10	0.186411
hsa-miR-139-5p	LRRC8C	4.49637e-19	0.259702		hsa-miR-142-3p	OAS2	2.43434e-10	0.185834
hsa-miR-139-5p	FAM189A2	2.7349e-19	0.261243		hsa-miR-142-3p	PTGER4	2.84423e-10	0.185141
hsa-miR-139-5p	COBLL1	1.89499e-19	0.262374		hsa-miR-142-3p	TCF19	7.6312e-09	0.169801
hsa-miR-139-5p	KLHL21	1.67752e-20	0.269713		hsa-miR-142-3p	ABRACL	1.39595e-07	0.154982
hsa-miR-139-5p	DAB2IP	8.21972e-21	0.27183		hsa-miR-142-3p	FMNL2	1.98093e-07	0.153101
hsa-miR-139-5p	PPARA	5.31071e-21	0.273117		hsa-miR-142-3p	TCF3	2.24968e-07	0.152412
hsa-miR-139-5p	TIPARP	3.98432e-21	0.27396		hsa-miR-142-3p	CCND2	5.36234e-07	0.147622
hsa-miR-139-5p	CAB39L	3.51796e-21	0.274324		hsa-miR-142-3p	RPS6KA3	5.58871e-07	0.14739
hsa-miR-139-5p	TP63	2.66684e-21	0.275132		hsa-miR-142-3p	OAS1	9.6381e-07	0.144301
hsa-miR-139-5p	PTPN14	3.50666e-22	0.280973		hsa-miR-142-3p	HDGF	3.18711e-06	0.137285
hsa-miR-139-5p	BOC	1.10439e-23	0.290618		hsa-miR-142-3p	DNMT1	4.64126e-06	0.135008
hsa-miR-139-5p	SGK1	3.12778e-24	0.294045		hsa-miR-142-3p	PLAUR	8.17105e-06	0.13151
hsa-miR-139-5p	SH3BP5	1.20637e-24	0.296603		hsa-miR-142-3p	SLC25A22	2.16942e-05	0.125253
hsa-miR-139-5p	CCDC82	1.06782e-24	0.296929		hsa-miR-142-3p	ACSL4	3.23889e-05	0.122598
hsa-miR-139-5p	USP53	7.74758e-25	0.297783		hsa-miR-142-3p	PARP1	5.10891e-05	0.119512
hsa-miR-139-5p	EOGT	7.06215e-25	0.298029		hsa-miR-142-3p	PLD1	6.61363e-05	0.11773
hsa-miR-139-5p	PER2	4.38606e-25	0.299291		hsa-miR-142-3p	TLE4	7.13442e-05	0.117202
hsa-miR-139-5p	MEIS2	1.95244e-25	0.301421		hsa-miR-142-3p	TLR4	7.97536e-05	0.116422
hsa-miR-139-5p	NTRK2	1.303e-25	0.302479		hsa-miR-142-3p	RGL1	8.61621e-05	0.115878
hsa-miR-139-5p	FAXDC2	9.18535e-26	0.30339		hsa-miR-142-3p	ZC3H12C	0.000102731	0.114631
hsa-miR-139-5p	IRS2	3.08918e-26	0.306209		hsa-miR-142-3p	PRDX1	0.000132716	0.112793
hsa-miR-139-5p	SGCB	6.37246e-27	0.310238		hsa-miR-142-3p	NUP210	0.000157324	0.111557
hsa-miR-139-5p	TCF7L2	4.87106e-27	0.310917		hsa-miR-142-3p	PELI1	0.000194705	0.109989
hsa-miR-139-5p	ZC3H12C	2.89755e-27	0.312226		hsa-miR-142-3p	SLC37A1	0.000203493	0.109662
hsa-miR-139-5p	MT1X	1.34399e-27	0.31415		hsa-miR-142-3p	PPIL1	0.000226805	0.108855
hsa-miR-139-5p	ADD3	7.7148e-28	0.315531		hsa-miR-142-3p	PDIA4	0.000227241	0.10884
hsa-miR-139-5p	ACSL4	4.81194e-28	0.3167		hsa-miR-142-3p	SRC	0.000275895	0.107382
hsa-miR-139-5p	TFPI	1.3846e-28	0.31976		hsa-miR-142-3p	SLC7A5	0.000435407	0.103879
hsa-miR-139-5p	MEST	7.58651e-29	0.321225		hsa-miR-142-3p	RTKN	0.00049793	0.102828
hsa-miR-139-5p	PCYOX1	3.0179e-29	0.323454		hsa-miR-142-3p	SIRT7	0.000534865	0.102264
hsa-miR-139-5p	KLF10	2.3271e-29	0.324079		hsa-miR-142-3p	PRNP	0.000598787	0.101368
hsa-miR-139-5p	BCL6	1.76704e-29	0.32474		hsa-miR-142-3p	ZEB2	0.000696382	0.100158
hsa-miR-139-5p	JADE1	8.96948e-30	0.32636		hsa-miR-142-3p	TPM3	0.00113884	0.0961241
hsa-miR-139-5p	EPS8	4.18417e-30	0.328171		hsa-miR-142-3p	UNC93B1	0.00154366	0.0935529
hsa-miR-139-5p	MYLK	7.98502e-31	0.332061		hsa-miR-142-3p	ST14	0.00172939	0.0925763
hsa-miR-139-5p	HADH	1.18153e-31	0.336481		hsa-miR-142-3p	SMG7	0.00179807	0.0922395
hsa-miR-139-5p	EIF4EBP2	1.03622e-32	0.342008		hsa-miR-142-3p	LPCAT1	0.0021011	0.0908817
hsa-miR-139-5p	PRICKLE2	7.97347e-33	0.342597		hsa-miR-142-3p	RACGAP1	0.0024986	0.0893499
hsa-miR-139-5p	ARHGEF10	6.22452e-33	0.343152		hsa-miR-142-3p	HMGN1	0.00260324	0.0889839
hsa-miR-139-5p	SASH1	4.77292e-33	0.343745		hsa-miR-142-3p	LYPLA2	0.00331195	0.0868089
hsa-miR-139-5p	SNTB2	3.31118e-33	0.344561		hsa-miR-142-3p	ZNF598	0.00437475	0.0842351
hsa-miR-139-5p	GAS1	9.89796e-35	0.352271		hsa-miR-142-3p	F11R	0.00438256	0.0842184
hsa-miR-139-5p	ZFP36L2	1.73979e-36	0.360889		hsa-miR-142-3p	POGK	0.00847178	0.0778374
hsa-miR-139-5p	CDH13	1.79014e-37	0.365624		hsa-miR-142-3p	TFRC	0.00868744	0.0775854
hsa-miR-139-5p	MYCBP2	4.16417e-38	0.36862		hsa-miR-142-3p	CDCP1	0.00914689	0.0770666
hsa-miR-139-5p	CLIP4	3.19439e-38	0.369161		hsa-miR-142-3p	MARCKSL1	0.009381	0.0768111
hsa-miR-139-5p	QKI	1.88515e-38	0.370235		hsa-miR-142-3p	QKI	0.011113	0.0750798
hsa-miR-139-5p	JUN	1.14419e-38	0.371247		hsa-miR-142-3p	MYCBP2	0.0112193	0.0749815
hsa-miR-139-5p	KDR	8.88031e-39	0.37176		hsa-miR-142-3p	ESRP1	0.0112603	0.0749439
hsa-miR-139-5p	FAM126A	5.92583e-39	0.372576		hsa-miR-142-3p	PPP1CA	0.0128175	0.0735958
hsa-miR-139-5p	CYR61	8.18393e-40	0.376538		hsa-miR-142-3p	UBAP2L	0.0130775	0.073385
hsa-miR-139-5p	VGLL3	9.27294e-42	0.385305		hsa-miR-142-3p	HSPA5	0.0144138	0.0723566
hsa-miR-139-5p	FGF7	3.6669e-42	0.387088		hsa-miR-142-3p	APH1A	0.0157072	0.0714383
hsa-miR-139-5p	ARID5B	2.57655e-42	0.387763		hsa-miR-142-3p	EGFR	0.0169888	0.0705917
hsa-miR-139-5p	KAT2B	2.31468e-43	0.392332		hsa-miR-142-3p	DHCR7	0.0238473	0.0668335
hsa-miR-139-5p	DST	5.79435e-44	0.394925		hsa-miR-142-3p	EPB41L2	0.0276236	0.0651515
hsa-miR-139-5p	UGP2	4.13814e-45	0.399805		hsa-miR-142-3p	REV3L	0.0290313	0.0645751
hsa-miR-139-5p	RCBTB2	1.2674e-45	0.401966		hsa-miR-142-3p	KAT2B	0.0299389	0.064216
hsa-miR-139-5p	TMTC1	3.24854e-46	0.404433		hsa-miR-142-3p	FNDC1	0.0334363	0.0629143
hsa-miR-139-5p	SLC12A4	7.73914e-47	0.40701		hsa-miR-142-3p	SQLE	0.0359486	0.0620494
hsa-miR-139-5p	PTGER4	2.97078e-47	0.408718		hsa-miR-142-3p	PPARA	0.0394653	0.0609213
hsa-miR-139-5p	CYP2U1	1.14068e-47	0.410415		hsa-miR-142-3p	SLC6A9	0.0396506	0.0608642
hsa-miR-139-5p	DNAJB4	7.43237e-48	0.411172		hsa-miR-96-5p	QKI	1.02169e-19	-0.264266
hsa-miR-139-5p	DPYSL2	8.94248e-49	0.414883		hsa-miR-96-5p	NR3C1	1.26805e-19	-0.263606
hsa-miR-139-5p	DMD	4.6675e-50	0.419981		hsa-miR-96-5p	ACSL4	7.43968e-19	-0.25813
hsa-miR-139-5p	TACC1	4.187e-52	0.427943		hsa-miR-96-5p	ARID5B	2.58219e-18	-0.2542
hsa-miR-139-5p	UTRN	1.15235e-52	0.430085		hsa-miR-96-5p	FAM126A	1.42808e-17	-0.248686
hsa-miR-139-5p	TLR4	9.0726e-53	0.43048		hsa-miR-96-5p	SPDEF	2.27779e-17	0.247156
hsa-miR-139-5p	TEF	5.77299e-53	0.431226		hsa-miR-96-5p	KCTD12	1.06215e-16	-0.242038
hsa-miR-139-5p	CRIM1	2.65581e-53	0.432503		hsa-miR-96-5p	PLXNA3	1.46374e-16	0.240957
hsa-miR-139-5p	FLI1	6.19541e-54	0.434883		hsa-miR-96-5p	PTPN14	1.73841e-16	-0.240375
hsa-miR-139-5p	PDGFD	3.4855e-54	0.435818		hsa-miR-96-5p	PKD2	2.06752e-16	-0.239787
hsa-miR-139-5p	FBLN5	2.99191e-54	0.436065		hsa-miR-96-5p	PRNP	4.28426e-16	-0.237298
hsa-miR-139-5p	AKR1C3	8.4108e-58	0.44904		hsa-miR-96-5p	TLR4	5.49681e-16	-0.236439
hsa-miR-139-5p	EPDR1	1.56795e-62	0.465492		hsa-miR-96-5p	CBX4	1.09951e-15	0.234034
hsa-miR-139-5p	MSRB3	1.7851e-64	0.472001		hsa-miR-96-5p	GAS1	5.72803e-15	-0.228198
hsa-miR-139-5p	CREB5	1.65693e-64	0.472108		hsa-miR-96-5p	TGFBR2	1.15888e-14	-0.225656
hsa-miR-139-5p	PKD2	9.76953e-65	0.472867		hsa-miR-96-5p	MYCBP2	1.24246e-14	-0.225403
hsa-miR-139-5p	RHOQ	8.79893e-65	0.473017		hsa-miR-96-5p	TLE4	1.71246e-14	-0.224234
hsa-miR-139-5p	CRY2	2.54749e-66	0.478054		hsa-miR-96-5p	TCEA3	1.80699e-14	0.224038
hsa-miR-139-5p	EGR1	1.24076e-66	0.479067		hsa-miR-96-5p	SH3D19	2.48037e-14	-0.222876
hsa-miR-139-5p	C20orf194	9.14005e-67	0.479496		hsa-miR-96-5p	CXCL12	3.10208e-14	-0.222052
hsa-miR-139-5p	KCTD12	1.976e-68	0.48483		hsa-miR-96-5p	EPB41L2	3.15391e-14	-0.221991
hsa-miR-139-5p	KANK2	1.08519e-69	0.488805		hsa-miR-96-5p	CLIP4	3.54616e-14	-0.221558
hsa-miR-139-5p	KLF9	8.30896e-72	0.495363		hsa-miR-96-5p	RGL1	4.57245e-14	-0.220615
hsa-miR-139-5p	NR3C1	7.89948e-72	0.495431		hsa-miR-96-5p	ZEB2	5.34406e-14	-0.220034
hsa-miR-139-5p	TGFBR3	2.7211e-72	0.496846		hsa-miR-96-5p	PPP1R37	5.49867e-14	0.219928
hsa-miR-139-5p	EPB41L2	9.73221e-73	0.498205		hsa-miR-96-5p	TCF7L2	6.66731e-14	-0.219208
hsa-miR-139-5p	RECK	9.26615e-73	0.49827		hsa-miR-96-5p	CYP2U1	7.99063e-14	-0.218529
hsa-miR-139-5p	ACSL1	6.70201e-73	0.498697		hsa-miR-96-5p	KLF10	1.20244e-13	-0.216988
hsa-miR-139-5p	PFKFB3	5.77417e-73	0.498893		hsa-miR-96-5p	RCBTB2	1.56404e-13	-0.215991
hsa-miR-139-5p	RGL1	1.48729e-73	0.500673		hsa-miR-200c-3p	NR2F6	5.82275e-17	0.244051
hsa-miR-139-5p	AFAP1L1	5.50303e-74	0.501971		hsa-miR-200c-3p	CBX4	2.96462e-13	0.213545
hsa-miR-139-5p	FOS	4.80598e-75	0.50513		hsa-miR-200c-3p	SIGIRR	4.1645e-13	0.212232
hsa-miR-139-5p	FGF2	5.47605e-77	0.510844		hsa-miR-200c-3p	PPP1R37	3.58025e-11	0.19417
hsa-miR-139-5p	APOLD1	8.82893e-79	0.516019		hsa-miR-200c-3p	LSM4	1.21934e-10	0.188885
hsa-miR-139-5p	DCUN1D3	1.95135e-79	0.51789		hsa-miR-200c-3p	P2RX4	4.23676e-10	0.183352
hsa-miR-139-5p	FOXN3	1.75498e-79	0.518021		hsa-miR-200c-3p	SIRT7	8.65233e-10	0.180102
hsa-miR-139-5p	RBP7	2.11603e-82	0.526208		hsa-miR-200c-3p	PRSS8	9.60032e-10	0.179623
hsa-miR-139-5p	ZEB2	2.61901e-85	0.534146		hsa-miR-200c-3p	AGR3	1.75396e-09	0.176825
hsa-miR-139-5p	SLC16A7	5.05834e-86	0.536064		hsa-miR-200c-3p	TIMM13	5.88466e-09	0.171064
hsa-miR-139-5p	METTL7A	2.42035e-86	0.536919		hsa-miR-200c-3p	AP1S1	6.58383e-09	0.17052
hsa-miR-139-5p	ZFP36	3.09246e-87	0.539295		hsa-miR-200c-3p	SPDEF	8.12686e-09	0.169494
hsa-miR-139-5p	CXCL12	1.57681e-87	0.540069		hsa-miR-200c-3p	CD9	3.18979e-08	0.162677
hsa-miR-139-5p	DUSP1	4.82196e-90	0.546637		hsa-miR-200c-3p	TSTD1	7.32033e-08	0.158392
hsa-miR-139-5p	GPAM	5.24034e-91	0.549116		hsa-miR-200c-3p	MAGED2	7.6665e-08	0.158151
hsa-miR-139-5p	FOXO1	2.31957e-92	0.552565		hsa-miR-200c-3p	LLGL2	7.99134e-08	0.157933
hsa-miR-139-5p	LIFR	2.3078e-95	0.56007		hsa-miR-200c-3p	RTKN	8.13235e-08	0.157841
hsa-miR-139-5p	FERMT2	3.30924e-97	0.564585		hsa-miR-200c-3p	PARP10	1.03121e-07	0.156591
hsa-miR-139-5p	DLC1	3.23568e-97	0.564609		hsa-miR-200c-3p	KDM4B	1.06618e-07	0.156415
hsa-miR-139-5p	ABCC9	4.4195e-98	0.566703		hsa-miR-200c-3p	MARCKSL1	1.18084e-07	0.155873
hsa-miR-139-5p	CAT	3.72339e-99	0.569284		hsa-miR-200c-3p	SLC25A22	2.05763e-07	0.152896
hsa-miR-139-5p	MMD	5.28911e-101	0.573669		hsa-miR-200c-3p	PLXNA3	4.063e-07	0.149169
hsa-miR-139-5p	SPTBN1	5.79999e-110	0.594042		hsa-miR-200c-3p	SLC22A18	4.95304e-07	0.148066
hsa-miR-139-5p	DDR2	3.80676e-110	0.594443		hsa-miR-200c-3p	TCEA3	8.53031e-07	0.144999
hsa-miR-139-5p	SIK2	9.15528e-111	0.595796		hsa-miR-200c-3p	ZNF703	1.3632e-06	0.142302
hsa-miR-139-5p	TXNIP	7.23992e-111	0.596018		hsa-miR-200c-3p	TJP3	1.39653e-06	0.142161
hsa-miR-139-5p	LPL	5.7381e-111	0.596238		hsa-miR-200c-3p	ZNF598	3.08787e-06	0.137475
hsa-miR-139-5p	PPARG	1.27709e-113	0.601957		hsa-miR-200c-3p	KRT19	7.7607e-06	0.131832
hsa-miR-139-5p	PDK4	9.55629e-114	0.602226		hsa-miR-200c-3p	COX8A	8.31982e-06	0.131397
hsa-miR-139-5p	MCAM	3.89486e-114	0.603056		hsa-miR-200c-3p	MEIS3	9.72538e-06	0.130415
hsa-miR-139-5p	SH3D19	5.72799e-115	0.60482		hsa-miR-200c-3p	DDR1	1.5609e-05	0.127395
hsa-miR-139-5p	FZD4	6.12166e-121	0.617161		hsa-miR-200c-3p	LYPLA2	1.96756e-05	0.125892
hsa-miR-139-5p	KLF4	2.55107e-121	0.617928		hsa-miR-342-3p	AGR3	1.0239e-52	0.43028
hsa-miR-139-5p	CD36	9.48078e-122	0.618793		hsa-miR-342-3p	P2RX4	6.94184e-30	0.32697
hsa-miR-139-5p	S1PR1	5.65749e-127	0.629097		hsa-miR-342-3p	GATA3	2.1906e-24	0.295004
hsa-miR-139-5p	LEPR	3.11021e-131	0.63722		hsa-miR-342-3p	SIAH2	1.65699e-22	0.283096
hsa-miR-139-5p	TGFBR2	8.34097e-152	0.673291		hsa-miR-342-3p	RET	4.10958e-22	0.280521
hsa-miR-139-5p	BTNL9	1.03869e-156	0.681194		hsa-miR-342-3p	KDM4B	1.78791e-21	0.276295
hsa-miR-139-5p	CAV1	2.89377e-165	0.694405		hsa-miR-342-3p	MAGED2	9.43833e-20	0.264508
hsa-miR-195-5p	EGFR	3.58099e-68	0.484009		hsa-miR-342-3p	SIGIRR	7.24068e-19	0.258215
hsa-miR-205-5p	TP63	5.01888e-43	0.390872		hsa-miR-342-3p	SPDEF	3.67509e-16	0.237824
hsa-miR-205-5p	DST	3.87495e-31	0.333742		hsa-miR-342-3p	SREBF1	4.21592e-16	0.237353
hsa-miR-205-5p	ARRDC3	4.47805e-29	0.322502		hsa-miR-342-3p	TCEA3	1.32517e-15	0.233382
hsa-miR-205-5p	FAM189A2	4.55802e-26	0.305206		hsa-miR-342-3p	MEIS3	2.9858e-15	0.230521
hsa-miR-205-5p	MYLK	5.71974e-24	0.292411		hsa-miR-342-3p	CCDC88C	2.59841e-14	0.222705
hsa-miR-205-5p	PIK3R1	2.22459e-21	0.27566		hsa-miR-342-3p	FAM102A	3.99747e-14	0.221114
hsa-miR-205-5p	FAM126A	2.64074e-19	0.261352		hsa-miR-342-3p	SLC22A18	6.45566e-14	0.219329
hsa-miR-205-5p	TGFBR3	5.23445e-19	0.259229		hsa-miR-342-3p	FGD3	7.1223e-14	0.218961
hsa-miR-205-5p	PTPN14	2.89622e-18	0.253834		hsa-miR-342-3p	CBX4	5.87949e-13	0.210892
hsa-miR-205-5p	ARID5B	4.50889e-16	0.237122		hsa-miR-342-3p	TJP3	2.00387e-11	0.196622
hsa-miR-205-5p	KCNC4	1.87961e-15	0.232156		hsa-miR-342-3p	PARP10	2.25156e-11	0.196132
hsa-miR-205-5p	GPM6B	1.60939e-14	0.224461		hsa-miR-342-3p	OAS1	2.41167e-11	0.195843
hsa-miR-205-5p	ZFP36L2	2.1116e-14	0.223467		hsa-miR-342-3p	TSTD1	3.80883e-11	0.193907
hsa-miR-205-5p	PRNP	2.77186e-14	0.222467		hsa-miR-342-3p	FAHD1	1.43799e-10	0.188162
hsa-miR-205-5p	EPHA2	4.17602e-14	0.220952		hsa-miR-342-3p	PRSS8	2.46605e-10	0.185777
hsa-miR-205-5p	LIFR	3.28252e-13	0.213152		hsa-miR-342-3p	CA12	4.05273e-10	0.183552
hsa-miR-205-5p	PER2	3.46492e-13	0.212944		hsa-miR-342-3p	NR2F6	1.18702e-09	0.178643
hsa-miR-205-5p	MT1X	8.82298e-13	0.209302		hsa-miR-342-3p	RALGPS2	2.54008e-09	0.175083
hsa-miR-205-5p	SGK1	1.1893e-12	0.208125		hsa-miR-342-3p	PPP1R37	1.18299e-08	0.16765
hsa-miR-205-5p	SEMA5A	1.54064e-12	0.207099		hsa-miR-342-3p	FAM162A	1.18519e-08	0.167641
hsa-miR-205-5p	PPL	4.88968e-12	0.202452		hsa-miR-342-3p	ERBB3	1.53535e-08	0.166357
hsa-miR-205-5p	TCF7L2	1.45761e-11	0.197953		hsa-miR-342-3p	TP53INP1	2.43857e-08	0.164038
hsa-miR-205-5p	DAB2IP	3.36747e-11	0.194431		hsa-miR-342-3p	CFB	5.3676e-08	0.160006
hsa-miR-205-5p	EGR1	6.41471e-11	0.191674		hsa-miR-342-3p	CDS1	2.03303e-07	0.152961
hsa-miR-205-5p	PDGFD	7.29183e-11	0.191121		hsa-miR-342-3p	SLC9A3R1	2.52676e-07	0.15178
hsa-miR-205-5p	JUN	1.09404e-10	0.189358		hsa-miR-342-3p	HIST2H2BE	2.74286e-07	0.151332
hsa-miR-205-5p	FZD7	1.15801e-10	0.18911		hsa-miR-342-3p	H2AFY	5.52475e-07	0.147455
hsa-miR-205-5p	TLE4	1.62315e-10	0.187629		hsa-miR-342-3p	MUC1	6.14619e-07	0.146856
hsa-miR-205-5p	DMD	1.72612e-10	0.187358		hsa-miR-342-3p	CACNB3	1.25292e-06	0.142791
hsa-miR-205-5p	KLF9	4.49306e-10	0.183087		hsa-miR-342-3p	KRT19	2.24655e-06	0.139372
hsa-miR-205-5p	MEIS2	4.77929e-10	0.182808		hsa-miR-342-3p	PLXNA3	2.31864e-06	0.139185
hsa-miR-205-5p	TXNIP	5.49735e-10	0.182173		hsa-miR-342-3p	ZG16B	3.29986e-06	0.137076
hsa-miR-205-5p	BOC	7.94229e-10	0.180494		hsa-miR-342-3p	CUEDC1	3.3319e-06	0.137018
hsa-miR-205-5p	CXCL12	1.21546e-09	0.178533		hsa-miR-342-3p	ZNF703	3.99782e-06	0.135917
hsa-miR-205-5p	TIPARP	1.42154e-09	0.177806		hsa-miR-342-3p	TRPM4	6.73853e-06	0.132712
hsa-miR-205-5p	RCBTB2	1.88887e-09	0.176478
hsa-miR-205-5p	CRIM1	2.18464e-09	0.175794
hsa-miR-205-5p	RGL1	3.78523e-09	0.173186
hsa-miR-205-5p	CREB5	4.14181e-09	0.172756
hsa-miR-205-5p	CYR61	6.20102e-09	0.17081
hsa-miR-205-5p	C20orf194	1.84857e-08	0.165431
hsa-miR-205-5p	EOGT	4.15003e-08	0.161332
hsa-miR-205-5p	USP53	6.14613e-08	0.159304
hsa-miR-205-5p	PELI1	8.04021e-08	0.157901
hsa-miR-205-5p	PKD2	1.74274e-07	0.153792
hsa-miR-205-5p	MSRB3	2.35128e-07	0.152172
hsa-miR-205-5p	LEPR	2.92961e-07	0.150971
hsa-miR-205-5p	NFIB	3.1088e-07	0.150646
hsa-miR-205-5p	FOXO1	3.76326e-07	0.149593
hsa-miR-205-5p	PRICKLE2	5.30123e-07	0.147686
hsa-miR-205-5p	OSR1	6.51698e-07	0.146526
hsa-miR-125b-5p	DST	1.19368e-64	0.47258
hsa-miR-125b-5p	CXCL12	3.33726e-57	0.446892
hsa-miR-125b-5p	TP63	8.23735e-55	0.43815
hsa-miR-125b-5p	MYLK	2.25324e-54	0.436525
hsa-miR-125b-5p	TGFBR2	5.76836e-53	0.431228
hsa-miR-125b-5p	LIFR	3.10513e-52	0.42844
hsa-miR-125b-5p	FAM126A	4.1164e-52	0.427971
hsa-miR-125b-5p	RCBTB2	2.12097e-51	0.425226
hsa-miR-125b-5p	MSRB3	4.90685e-51	0.423812
hsa-miR-125b-5p	RECK	4.25909e-50	0.420138
hsa-miR-125b-5p	ARRDC3	2.4996e-48	0.413088
hsa-miR-125b-5p	PKD2	3.50958e-47	0.408421
hsa-miR-125b-5p	KLF9	1.42884e-46	0.405911
hsa-miR-125b-5p	FAM189A2	4.0495e-46	0.404035
hsa-miR-125b-5p	FOXO1	1.67477e-44	0.39723
hsa-miR-125b-5p	CYR61	2.76287e-44	0.396303
hsa-miR-125b-5p	TXNIP	3.63747e-43	0.39148
hsa-miR-125b-5p	EGR1	1.79149e-42	0.388457
hsa-miR-125b-5p	C20orf194	5.23914e-42	0.386403
hsa-miR-125b-5p	LEPR	5.5699e-42	0.386286
hsa-miR-125b-5p	PDGFD	1.03072e-41	0.385101
hsa-miR-125b-5p	RGL1	2.47312e-41	0.383408
hsa-miR-125b-5p	ARID5B	2.97481e-39	0.373961
hsa-miR-125b-5p	S1PR1	1.19872e-38	0.371153
hsa-miR-125b-5p	ZFP36L2	9.2938e-38	0.366975
hsa-miR-125b-5p	PTPN14	2.44712e-36	0.360171
hsa-miR-125b-5p	GAS1	3.29322e-36	0.359546
hsa-miR-125b-5p	KCTD12	9.54929e-36	0.35729
hsa-miR-125b-5p	TCF7L2	1.30302e-35	0.356628
hsa-miR-125b-5p	TGFBR3	5.50663e-34	0.348528
hsa-miR-125b-5p	FGF7	3.47995e-33	0.34445
hsa-miR-125b-5p	METTL7A	3.99601e-33	0.344142
hsa-miR-125b-5p	SLC12A4	6.96183e-33	0.342901
hsa-miR-125b-5p	SH3D19	9.20477e-33	0.342274
hsa-miR-125b-5p	CYP2U1	9.84056e-33	0.342124
hsa-miR-125b-5p	MEIS2	1.16835e-32	0.341738
hsa-miR-125b-5p	PRNP	1.84258e-32	0.340711
hsa-miR-125b-5p	DMD	2.79806e-32	0.339766
hsa-miR-125b-5p	CAV1	4.90883e-32	0.338489
hsa-miR-125b-5p	PER2	7.39218e-32	0.337555
hsa-miR-125b-5p	DUSP1	1.2424e-31	0.336366
hsa-miR-125b-5p	EOGT	1.71222e-31	0.335628
hsa-miR-125b-5p	DAB2IP	1.97605e-31	0.335298
hsa-miR-125b-5p	TLE4	2.41758e-31	0.334833
hsa-miR-125b-5p	DLC1	2.93452e-31	0.334386
hsa-miR-125b-5p	BOC	4.17744e-31	0.333568
hsa-miR-125b-5p	SEMA5A	8.37035e-31	0.331951
hsa-miR-125b-5p	CREB5	1.32981e-30	0.330869
hsa-miR-125b-5p	JUN	2.28289e-30	0.3296
hsa-miR-125b-5p	SGK1	2.76056e-30	0.329153
hsa-miR-125b-5p	PIK3R1	3.63952e-30	0.3285
hsa-miR-125b-5p	TEF	3.82405e-30	0.328383
hsa-miR-125b-5p	DPYSL2	8.56914e-30	0.326469
hsa-miR-125b-5p	NR3C1	9.75637e-30	0.32616
hsa-miR-125b-5p	CRIM1	1.30517e-29	0.325465
hsa-miR-125b-5p	ZFP36	1.24185e-28	0.320025
hsa-miR-125b-5p	MT1X	3.02496e-28	0.317844
hsa-miR-125b-5p	UTRN	3.92612e-28	0.317202
hsa-miR-125b-5p	CRY2	6.94378e-28	0.315792
hsa-miR-125b-5p	GPM6B	9.56006e-28	0.314998
hsa-miR-125b-5p	KANK2	2.77627e-27	0.312333
hsa-miR-125b-5p	PTGER4	3.36642e-27	0.311849
hsa-miR-125b-5p	FERMT2	3.5802e-27	0.311694
hsa-miR-125b-5p	PDK4	6.00373e-27	0.310388
hsa-miR-125b-5p	FOXN3	4.21993e-26	0.305405
hsa-miR-125b-5p	BTNL9	3.9466e-25	0.29957
hsa-miR-125b-5p	EPB41L2	4.10191e-25	0.299468
hsa-miR-125b-5p	KLF4	8.78412e-25	0.297449
hsa-miR-125b-5p	KCNC4	1.35821e-24	0.296286
hsa-miR-125b-5p	ARHGEF10	2.17805e-24	0.29502
hsa-miR-125b-5p	CLIP4	3.77648e-24	0.293536
hsa-miR-125b-5p	FLI1	1.61965e-23	0.289568
hsa-miR-125b-5p	ZEB2	4.72312e-23	0.28661
hsa-miR-125b-5p	DDR2	1.03215e-22	0.284427
hsa-miR-125b-5p	FBLN5	1.30861e-22	0.283761
hsa-miR-125b-5p	APOLD1	1.34478e-22	0.283684
hsa-miR-125b-5p	FOS	1.35905e-22	0.283655
hsa-miR-125b-5p	DNAJB4	1.6577e-22	0.283095
hsa-miR-125b-5p	EPHA2	1.74939e-22	0.282943
hsa-miR-125b-5p	PRICKLE2	5.70866e-22	0.279583
hsa-miR-125b-5p	FGF2	7.48584e-22	0.278806
hsa-miR-125b-5p	CCDC82	1.38096e-21	0.277043
hsa-miR-125b-5p	RBP7	2.49157e-21	0.27533
hsa-miR-125b-5p	RGS2	1.01865e-20	0.271195
hsa-miR-125b-5p	OSR1	1.50004e-20	0.270046
hsa-miR-125b-5p	DCUN1D3	3.06942e-19	0.260886
hsa-miR-125b-5p	SIK2	3.75869e-19	0.260259
hsa-miR-125b-5p	KLHL21	3.85271e-19	0.260182
hsa-miR-125b-5p	SASH1	8.46723e-19	0.257725
hsa-miR-125b-5p	USP53	1.23761e-18	0.256531
hsa-miR-125b-5p	MCAM	1.83979e-18	0.255278
hsa-miR-125b-5p	SPTBN1	2.00018e-18	0.255012
hsa-miR-125b-5p	ADD3	6.64131e-18	0.251171
hsa-miR-125b-5p	KLF10	8.17832e-18	0.250498
hsa-miR-125b-5p	QKI	1.601e-17	0.248312
hsa-miR-125b-5p	FZD7	2.06225e-17	0.247483
hsa-miR-125b-5p	NFAT5	4.49224e-17	0.244913
hsa-miR-125b-5p	PPL	4.95617e-17	0.244587
hsa-miR-125b-5p	TIPARP	6.1825e-17	0.243851
hsa-miR-125b-5p	TLR4	8.29122e-17	0.24287
hsa-miR-125b-5p	TMTC1	9.17097e-17	0.242532
hsa-miR-125b-5p	FZD4	1.48778e-16	0.240902
hsa-miR-125b-5p	CD36	3.18562e-16	0.238313
hsa-miR-125b-5p	ABCC9	4.16932e-16	0.237391
hsa-miR-145b-5p	CAV1	4.50548e-140	0.65333
hsa-miR-145b-5p	TGFBR2	1.9656e-120	0.616134
hsa-miR-145b-5p	DDR2	1.6058e-114	0.603873
hsa-miR-145b-5p	SH3D19	1.38349e-109	0.593212
hsa-miR-145b-5p	SPTBN1	2.61625e-105	0.583639
hsa-miR-145b-5p	MCAM	3.10684e-105	0.583469
hsa-miR-145b-5p	FERMT2	2.40262e-101	0.574475
hsa-miR-145b-5p	MSRB3	1.5787e-98	0.567779
hsa-miR-145b-5p	BTNL9	1.40425e-96	0.563055
hsa-miR-145b-5p	TXNIP	4.01395e-96	0.561939
hsa-miR-145b-5p	LEPR	4.3186e-96	0.561861
hsa-miR-145b-5p	FZD4	3.32884e-92	0.552167
hsa-miR-145b-5p	CD36	6.41074e-92	0.551445
hsa-miR-145b-5p	SIK2	7.61058e-90	0.546124
hsa-miR-145b-5p	S1PR1	1.14942e-87	0.540431
hsa-miR-145b-5p	FOXO1	2.94372e-87	0.539352
hsa-miR-145b-5p	PDK4	2.01861e-84	0.531747
hsa-miR-145b-5p	MMD	1.36447e-83	0.529484
hsa-miR-145b-5p	LPL	1.38307e-83	0.529468
hsa-miR-145b-5p	ABCC9	1.33921e-82	0.526757
hsa-miR-145b-5p	LIFR	2.58117e-82	0.525969
hsa-miR-145b-5p	PKD2	5.70073e-82	0.525015
hsa-miR-145b-5p	CAT	2.09527e-81	0.52344
hsa-miR-145b-5p	PPARG	3.15186e-79	0.517297
hsa-miR-145b-5p	RECK	7.21589e-79	0.51627
hsa-miR-145b-5p	DLC1	4.05033e-77	0.511225
hsa-miR-145b-5p	CXCL12	8.64595e-77	0.510266
hsa-miR-145b-5p	FOXN3	3.1908e-76	0.508606
hsa-miR-145b-5p	ZEB2	2.90916e-75	0.505777
hsa-miR-145b-5p	EPB41L2	4.11153e-73	0.49934
hsa-miR-145b-5p	METTL7A	7.60539e-72	0.495481
hsa-miR-145b-5p	RGL1	1.7538e-71	0.494367
hsa-miR-145b-5p	TGFBR3	2.12461e-71	0.494111
hsa-miR-145b-5p	NR3C1	3.05214e-71	0.493626
hsa-miR-145b-5p	RHOQ	2.89235e-70	0.490599
hsa-miR-145b-5p	EPDR1	2.13943e-69	0.48788
hsa-miR-145b-5p	DCUN1D3	1.15186e-68	0.485573
hsa-miR-145b-5p	GPAM	3.18133e-68	0.484173
hsa-miR-145b-5p	KANK2	5.99027e-67	0.480089
hsa-miR-145b-5p	C20orf194	8.7807e-66	0.476304
hsa-miR-145b-5p	FGF2	2.42349e-64	0.471561
hsa-miR-145b-5p	PFKFB3	2.10111e-63	0.468433
hsa-miR-145b-5p	CYP2U1	1.19512e-62	0.465891
hsa-miR-145b-5p	KLF9	4.58951e-62	0.463909
hsa-miR-145b-5p	RBP7	7.04924e-61	0.459844
hsa-miR-145b-5p	SLC16A7	4.01881e-60	0.457225
hsa-miR-145b-5p	AFAP1L1	9.89123e-60	0.455861
hsa-miR-145b-5p	CREB5	1.02096e-59	0.455813
hsa-miR-145b-5p	UTRN	2.31951e-59	0.454565
hsa-miR-145b-5p	KLF4	8.77816e-59	0.452529
hsa-miR-145b-5p	CRIM1	1.71165e-58	0.451502
hsa-miR-145b-5p	TEF	6.03322e-58	0.449555
hsa-miR-145b-5p	KCTD12	8.79597e-58	0.44897
hsa-miR-145b-5p	CRY2	1.60863e-57	0.448031
hsa-miR-145b-5p	MYLK	4.14066e-57	0.446554
hsa-miR-145b-5p	DST	4.64722e-57	0.446374
hsa-miR-145b-5p	DMD	7.06093e-57	0.445717
hsa-miR-145b-5p	RCBTB2	1.38076e-56	0.444663
hsa-miR-145b-5p	PDGFD	1.5081e-53	0.433431
hsa-miR-145b-5p	FAM126A	7.45915e-53	0.430804
hsa-miR-145b-5p	DPYSL2	2.31843e-51	0.425077
hsa-miR-145b-5p	TACC1	3.3767e-51	0.424443
hsa-miR-145b-5p	CDH13	2.394e-50	0.421122
hsa-miR-145b-5p	ACSL1	8.7054e-50	0.418912
hsa-miR-145b-5p	SLC12A4	2.99273e-49	0.416783
hsa-miR-145b-5p	UGP2	3.20871e-49	0.416663
hsa-miR-145b-5p	TLR4	7.89505e-47	0.406975
hsa-miR-145b-5p	APOLD1	6.78901e-46	0.4031
hsa-miR-145b-5p	VGLL3	4.04429e-45	0.399847
hsa-miR-145b-5p	ARID5B	5.50766e-45	0.39928
hsa-miR-145b-5p	FBLN5	1.03743e-44	0.398115
hsa-miR-145b-5p	AKR1C3	1.69793e-44	0.397205
hsa-miR-145b-5p	DUSP1	2.05629e-44	0.39685
hsa-miR-145b-5p	PRICKLE2	3.94986e-44	0.395639
hsa-miR-145b-5p	GAS1	6.71625e-44	0.39465
hsa-miR-145b-5p	QKI	9.35335e-44	0.394031
hsa-miR-145b-5p	DNAJB4	1.012e-43	0.393884
hsa-miR-145b-5p	FGF7	4.31165e-42	0.386777
hsa-miR-145b-5p	ARHGEF10	2.58718e-41	0.383321
hsa-miR-145b-5p	TMTC1	8.50911e-41	0.381001
hsa-miR-145b-5p	KDR	1.32005e-40	0.38014
hsa-miR-145b-5p	MYCBP2	5.85155e-40	0.377204
hsa-miR-145b-5p	KAT2B	1.34266e-39	0.375552
hsa-miR-145b-5p	FLI1	1.30986e-38	0.370973
hsa-miR-145b-5p	EGR1	3.16707e-38	0.369179
hsa-miR-145b-5p	ZFP36	4.52914e-38	0.368448
hsa-miR-145b-5p	SNTB2	1.03559e-37	0.366752
hsa-miR-145b-5p	CLIP4	8.30017e-36	0.357588
hsa-miR-145b-5p	SASH1	8.9279e-36	0.357433
hsa-miR-145b-5p	PTPN14	2.70001e-35	0.35507
hsa-miR-145b-5p	EIF4EBP2	3.67899e-35	0.354406
hsa-miR-145b-5p	EOGT	2.03965e-34	0.3507
hsa-miR-145b-5p	FOS	9.97841e-34	0.34722
hsa-miR-145b-5p	TCF7L2	1.23902e-33	0.346742
hsa-miR-145b-5p	SGCB	1.28232e-32	0.341529
hsa-miR-145b-5p	JADE1	1.72829e-32	0.340856
hsa-miR-145b-5p	PTGER4	1.00641e-31	0.336849
hsa-miR-145b-5p	ACSL4	8.51046e-31	0.331913
hsa-miR-145b-5p	CYR61	1.24198e-30	0.331029
hsa-miR-145b-5p	CCDC82	1.37626e-30	0.330789
hsa-miR-145b-5p	MT1X	1.93793e-30	0.329986
hsa-miR-145b-5p	PCYOX1	2.23338e-30	0.329652
hsa-miR-145b-5p	ARRDC3	2.33959e-30	0.329543
hsa-miR-145b-5p	TP63	2.60252e-30	0.329292
hsa-miR-145b-5p	PIK3R1	3.92367e-29	0.322821
hsa-miR-145b-5p	ZFP36L2	6.29935e-29	0.321676
hsa-miR-145b-5p	PRNP	1.48334e-28	0.319591
hsa-miR-145b-5p	EPS8	7.58857e-28	0.315572
hsa-miR-145b-5p	FAXDC2	1.171e-27	0.314493
hsa-miR-145b-5p	MEIS2	1.29585e-27	0.314241
hsa-miR-145b-5p	ADD3	8.34125e-27	0.309555
hsa-miR-145b-5p	HADH	1.09252e-26	0.308869
hsa-miR-145b-5p	CAB39L	1.19101e-26	0.308649
hsa-miR-145b-5p	KLF10	3.36182e-26	0.305991
hsa-miR-145b-5p	ZC3H12C	3.64266e-26	0.305784
hsa-miR-145b-5p	DAB2IP	6.725e-26	0.3042
hsa-miR-145b-5p	BCL6	7.64354e-26	0.303867
hsa-miR-145b-5p	NTRK2	7.85463e-26	0.303797
hsa-miR-145b-5p	USP53	1.90727e-25	0.301483
hsa-miR-145b-5p	FAM189A2	3.03889e-25	0.300259
hsa-miR-145b-5p	MEST	3.14306e-25	0.30017
hsa-miR-145b-5p	COBLL1	9.48125e-25	0.297246
hsa-miR-145b-5p	KLHL21	1.28787e-23	0.290197
hsa-miR-145b-5p	BOC	1.95702e-23	0.289048
hsa-miR-145b-5p	PPARA	1.02743e-22	0.28444
hsa-miR-145b-5p	TLE4	2.80707e-22	0.281605
hsa-miR-145b-5p	IRS2	4.87576e-22	0.280034
hsa-miR-145b-5p	PER2	9.72305e-22	0.278055
hsa-miR-145b-5p	JUN	2.72602e-20	0.268262
hsa-miR-145b-5p	TFPI	2.77431e-20	0.268209
hsa-miR-145b-5p	RPS6KA3	5.20639e-20	0.266313
hsa-miR-145b-5p	SGK1	1.31574e-19	0.263493
hsa-miR-145b-5p	NFAT5	2.25323e-19	0.261841
hsa-miR-145b-5p	SH3BP5	7.3925e-19	0.25815
hsa-miR-145b-5p	REV3L	8.57313e-19	0.257686
hsa-miR-145b-5p	NFIB	8.68574e-19	0.257645
hsa-miR-145b-5p	SEMA5A	1.01593e-18	0.257153
hsa-miR-145b-5p	PPL	2.02025e-18	0.254981
hsa-miR-145b-5p	MET	5.11134e-18	0.252015
hsa-miR-145b-5p	TIPARP	5.46638e-18	0.251798
hsa-miR-145b-5p	FMNL2	1.63826e-17	0.248237
hsa-miR-145b-5p	LIMCH1	3.38654e-17	0.245849
hsa-miR-145b-5p	LRRC8C	8.22509e-17	0.242896
hsa-miR-145b-5p	CYBRD1	1.43242e-16	0.24103
hsa-miR-145b-5p	KCNC4	2.34102e-16	0.239365
hsa-miR-145b-5p	EPHA2	5.08297e-16	0.236709
hsa-miR-145b-5p	GPM6B	5.73192e-16	0.236295
hsa-miR-145b-5p	CCND2	1.29029e-15	0.233475
hsa-miR-145b-5p	CFL2	3.85179e-15	0.229616
hsa-miR-145b-5p	RRAGD	1.19538e-14	0.225543
hsa-miR-145b-5p	OSR1	8.35619e-14	0.218361
hsa-miR-145b-5p	IL1R1	2.80301e-13	0.21376

## Sheet: Table S3
	Table S3：Analysis of CIBERSORT scores of 22 types of immune cells in breast cancers versus controls.
	Cell type	CRC score	Control score	log2FC	P value
	B cells memory	0.000422331	0.000661519	4.01551	0.024743
	B cells naive	0.0589671	0.0398162	-0.706481	1.08816e-10
	Dendritic cells activated	0.00114138	0.00482895	0.624266	0.000470834
	Dendritic cells resting	0.0530903	0.0221127	0.0787643	0.640837
	Eosinophils	0.0147959	0.0069185	-0.475329	0.434274
	Macrophages M0	0.0199749	0.207681	2.14424	2.06413e-33
	Macrophages M1	0.0367754	0.0633952	1.19969	9.0486e-30
	Macrophages M2	0.1653	0.11035	-0.822146	3.70382e-24
	Mast cells activated	0.0777126	0.0777126	-3.34785	1.02118e-24
	Mast cells resting	0.0943052	0.0167902	-0.120942	0.224667
	Monocytes	0.0132513	0.00457357	-0.310469	1.2622e-11
	Neutrophils	0.00285146	0.00965054	-1.29971	0.832165
	NK cells activated	0.0233937	0.0170168	-0.424035	0.00561246
	NK cells resting	0.00549671	0.0215508	-0.832353	1.21554e-05
	Plasma cells	0.174037	0.0617923	-0.40776	0.00448707
	T cells CD4 memory activated	0.00469985	0.0439632	3.21742	1.23343e-11
	T cells CD4 memory resting	0.176125	0.17369	-0.34598	1.02252e-07
	T cells CD4 naive	0	0.000254498	12.2325	0.652988
	T cells CD8	0.0962019	0.0833606	-0.282285	0.00110576
	T cells follicular helper	0.0114058	0.0280413	1.38792	6.72156e-21
	T cells gamma delta	0.00137277	0.00120921	1.30286	0.000106468
	T cells regulatory (Tregs)	0.043243	0.0433419	2.71072	7.91562e-37
